# Supplementary material for: Analysis of the three-dimensional anatomical variance of the distal radius using 3D shape models
Source: Springer Nature journal article supplement (doi:10.1186/s12880-017-0193-9), 2017-03-09

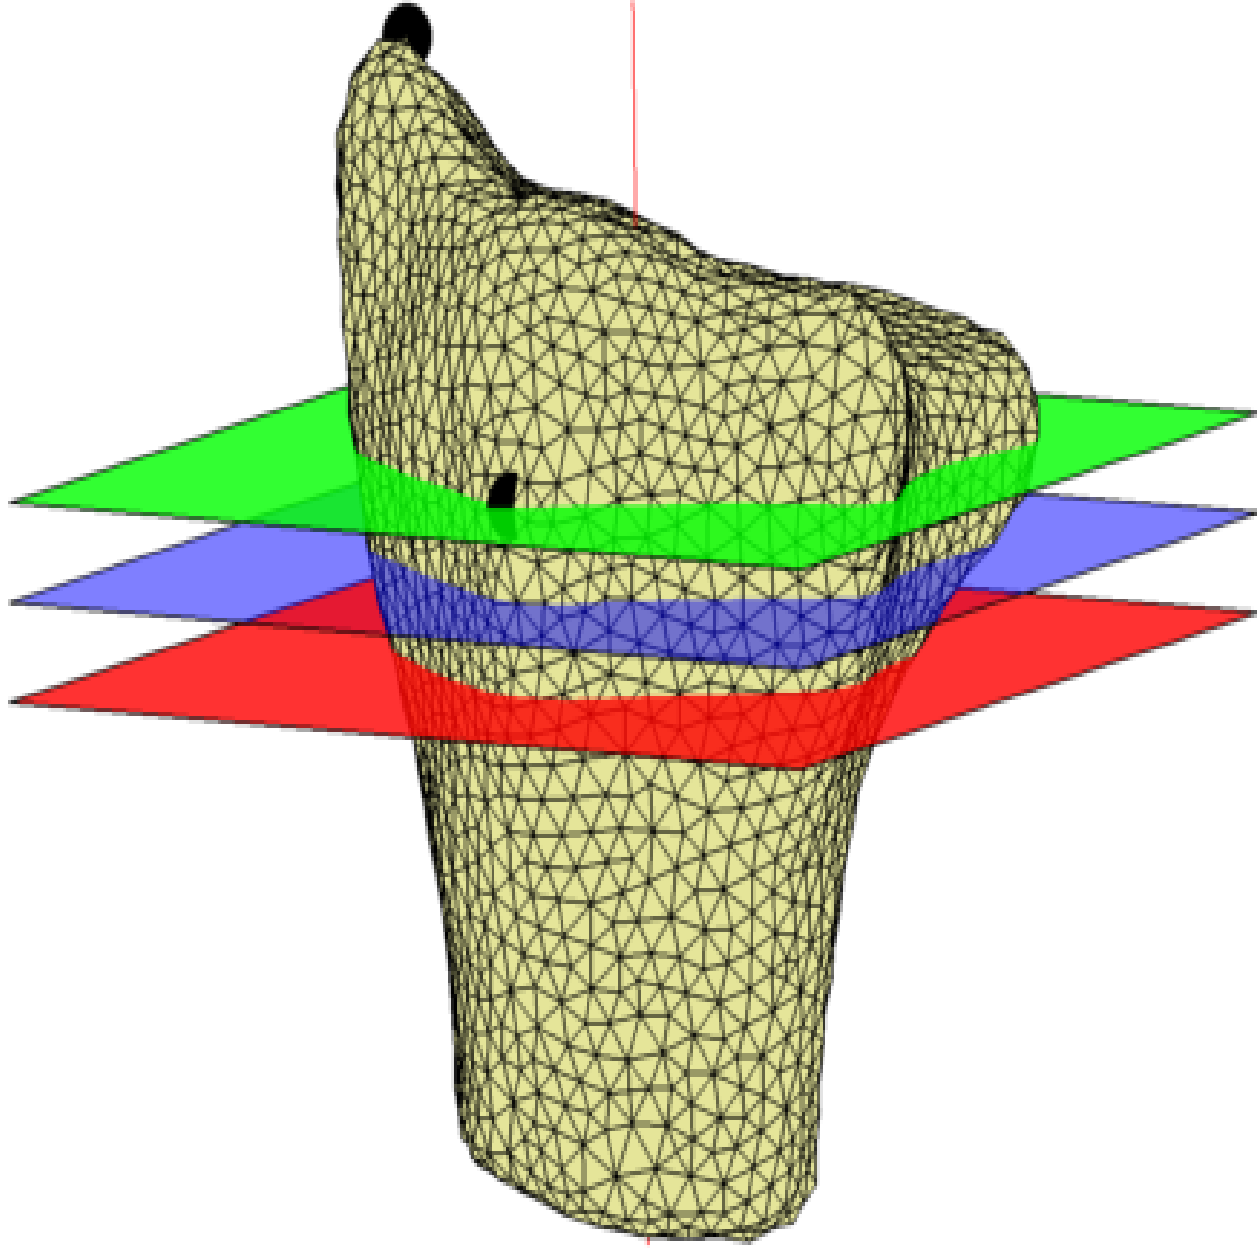

Supplement: MOESM2 [file 12129180]
