# Supplementary material for: Analysis of the three-dimensional anatomical variance of the distal radius using 3D shape models
Source: Springer Nature journal article supplement (doi:10.1186/s12880-017-0193-9), 2017-03-09
Supplement: MOESM3 [file 12129180]

## Animated shape model modes for the female right radii model

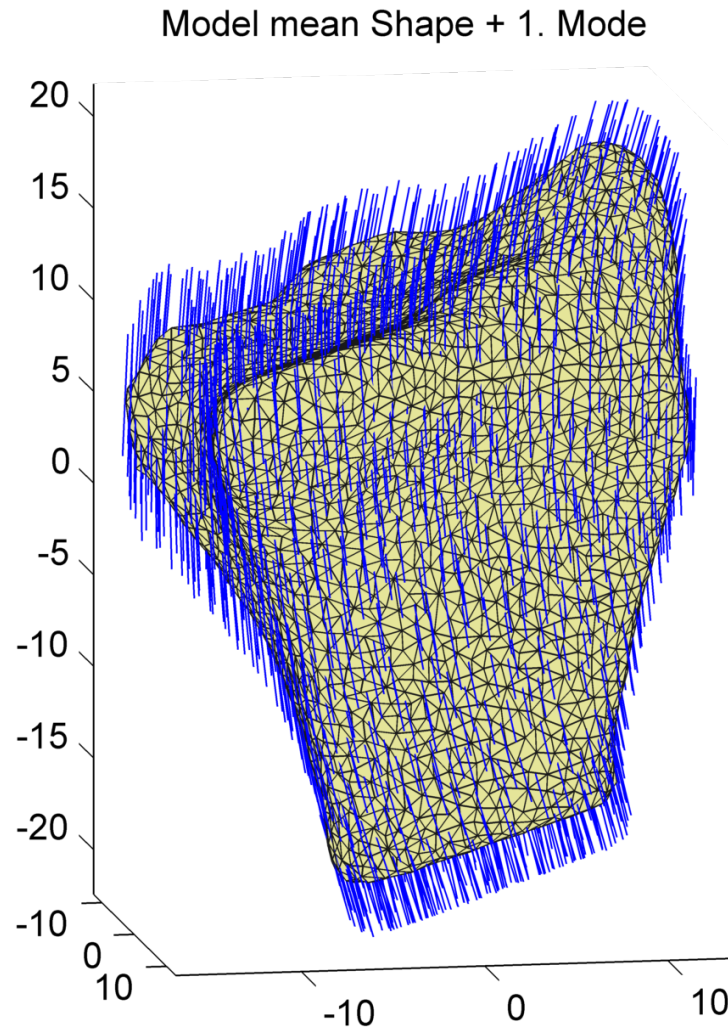

Figure 1: Mean shape of the female right radii model, including the first mode (drawn in blue).

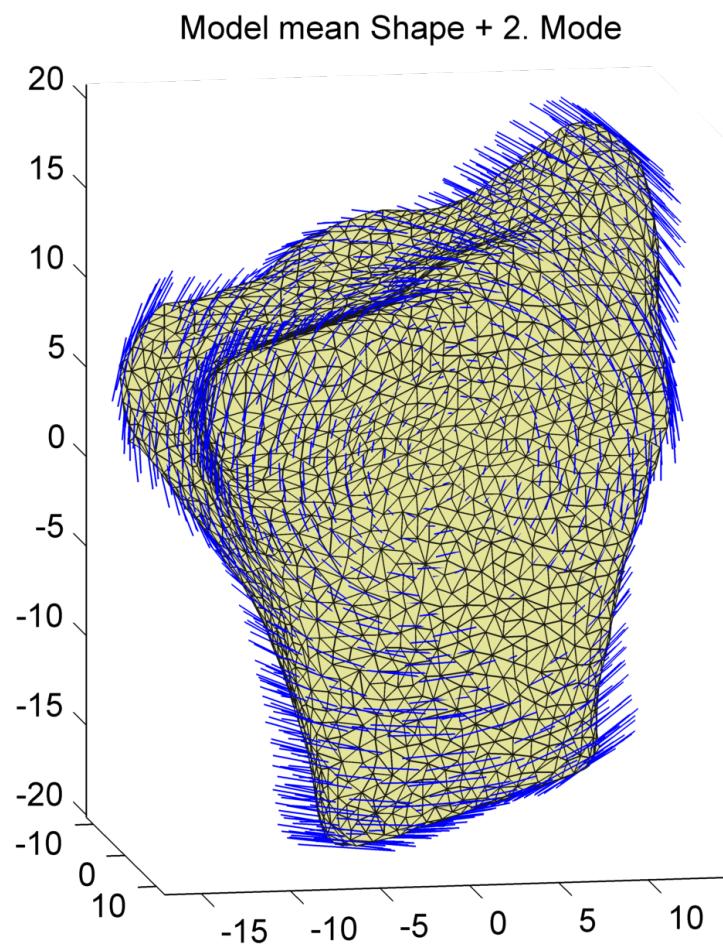

Figure 2: Mean shape of the female right radii model, including the second mode (drawn in blue).

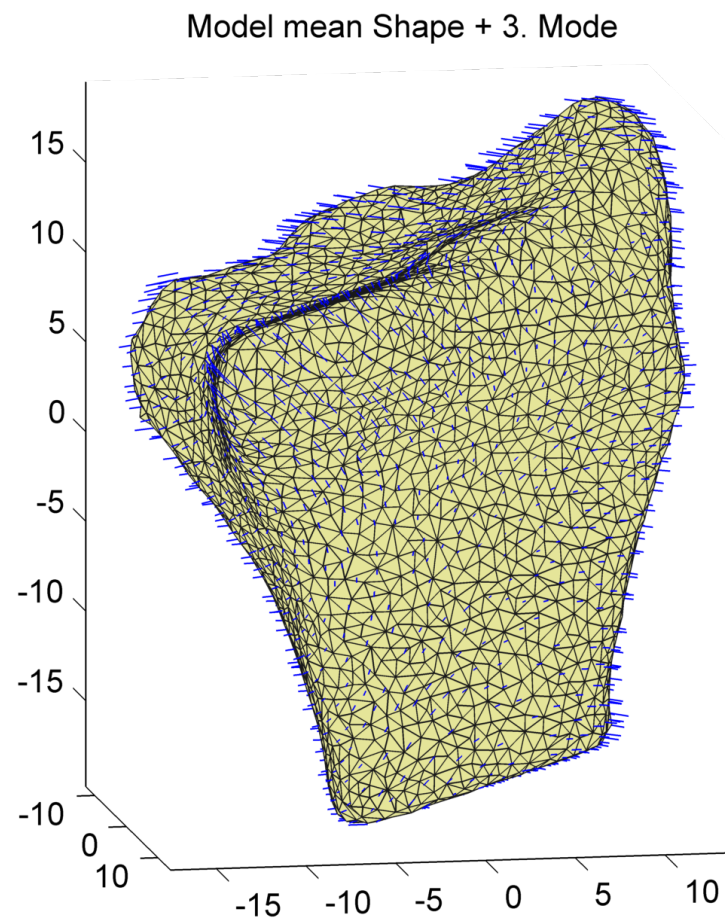

Figure 3: Mean shape of the female right radii model, including the third mode (drawn in blue).

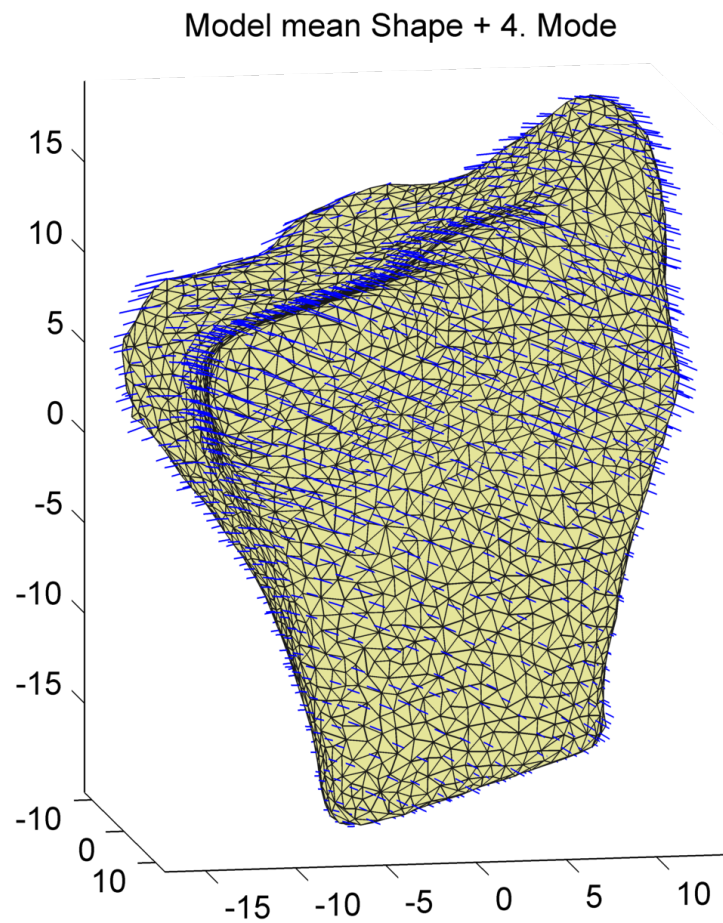

Figure 4: Mean shape of the female right radii model, including the fourth mode (drawn in blue).
